# Supplementary material for: Phosphorylation of MCAD selectively rescues PINK1 deficiencies in behavior and metabolism
Source: PubMed Central journal article supplement — Mol Biol Cell. 2018 May 15;29(10):1219–27. doi: 10.1091/mbc.E18-03-0155 (PMC5935071; doi:10.1091/mbc.e18-03-0155), 2018-05-15
Supplement: mbc-29-1219-s001.pdf [file mbc-29-1219-s001.pdf]

# Supplemental Materials

*Molecular Biology of the Cell*

Course et al.

## Supplemental Information

### Phosphorylation of MCAD selectively rescues *PINK1* deficiencies in behavior and metabolism

Meredith M. Course<sup>1,2</sup>, Anna I. Scott<sup>3</sup>, Carmen Schoor<sup>5</sup>, Chung-Han Hsieh<sup>1</sup>, Amanda M. Papakyrikos<sup>1,4</sup>, Dominic Winter<sup>5</sup>, Tina M. Cowan<sup>3</sup>, and Xinnan Wang<sup>1\*</sup>

## Supplemental Figure Legends

**Figure S1. Schematic overview of PINK1 phosphopeptide analysis. Related to Figure 1.**

**Figure S2. Phosphopeptide abundance of MCAD S347 in *Drosophila*. Related to Figure 1.**

Extracted ion chromatograms (XICs) for the monoisotopic peak of the phosphopeptide harboring (A) MCAD serine 347, (B) an MCAD control peptide, and (C) Marf serine 38.

(A) XIC of the doubly charged ion of RNpSYIASIAK at m/z 626.79

(B) XIC of the doubly charged peak of LSAWEIDQGR at m/z 587.8

(C) XIC of the doubly charged peak of SGPGpSPLSR at m/z 469.21.

**Figure S3. Fragment ion spectrum of the doubly charged precursor ion at m/z 626.79 identifying the phosphopeptide RNpSYIASIAK. Related to Figure 1.**

Phosphorylation at serine 3 is identified due to the presence of a neutral loss of H<sub>3</sub>PO<sub>4</sub> from the b<sub>6</sub> ion, as well as the presence of the unmodified y<sub>4</sub> ion.

**Figure S4. Expression of MCAD transgenes. Related to Figures 1 and 3.**

(A) Fly lysates were immunoblotted as indicated to verify that an MCAD antibody generated against mammalian MCAD also recognizes endogenous fly MCAD.

(B) (Left) Representative Western blot of whole body lysate from *PINK1<sup>RV</sup>* (control) and *PINK1<sup>B9</sup>* (null) male flies with and without transgenes; probed with anti-tubulin as a loading control and anti-V5 to identify transgenic expression. (Right) Quantification of V5 expression normalized to tubulin expression. n = 5 flies lysed per sample for each experiment, 3 biological replicates per genotype. One-way ANOVA, p = 0.977, n.s. means “not significant.”

(C) Fly lysates were immunoblotted as indicated to compare expression levels of transgenic MCAD driven by Actin5C-GAL4 to expression levels of endogenous MCAD. Note that endogenous MCAD migrates faster than V5-tagged MCAD in the anti-MCAD blot.

**Figure S5. Acylcarnitine analysis in *PINK1* null flies carrying MCAD transgenes. Related to Figure 3.**

Acylcarnitines analysis in 6-7-day-old male flies. n=6-8 samples, 5 flies per sample, 2 technical replicates averaged per sample. One-way ANOVAs, n.s. means “not significant.”

## Supplemental Table Legends

**Table S1. Phos (STY) site probabilities. Related to Figure 1.**

**Table S2. Acylcarnitine profile of *PINK1* null flies. Related to Figures 3 and 4.**

Student's t-tests, n = 3-8 samples, 5 flies per sample.

**Table S3. Amino acid profile of *PINK1* null flies. Related to Figure 4.**

Student's t-tests, n = 3-4 samples, 5 flies per sample.

## **Supplemental Experimental Procedures**

### ***Transgenic Flies***

The UAS-MCAD transgene was generated by PCR amplifying *CG12262* from pOT2-*CG12262* (DGRC LD22634) and ligating it into pUASTattB (Bischof et al., 2007) with an added V5 tag. UAS-MCADS347A, UAS-MCADS347D, and UAS-MCADS347DD were generated by applying site-directed mutagenesis to this UAS-MCAD plasmid (QuikChange Lightning Site-Directed Mutagenesis Kit, Agilent 210518). All constructs were verified by sequencing, then transgenes were injected into *y<sup>1</sup> v<sup>1</sup>; P{CaryP}attP40* (BDSC 36304) flies and incorporated using the PhiC31 integrase system by The BestGene, Inc.

### ***CRISPR/Cas9***

The MCAD<sup>mut</sup> fly was generated following the protocol outlined by the O'Connor-Giles, Wildonger, and Harrison labs for defined deletions (Gratz et al., 2013, 2014, 2015). Briefly, the flyCRISPR Optimal Target Finder (<http://tools.flycrispr.molbio.wisc.edu/targetFinder/>) was used to identify two target sites in *CG12262*, one in exon 2 and one in exon 3, which were compared to fly sequences to rule out targets in regions with SNPs. Oligos based on these targets were annealed in the presence of T4 PNK (NEB M0201), then ligated into the pU6-BbsI-chiRNA plasmid (Addgene 45946) previously digested by the BbsI restriction enzyme (NEB R0539), using T4 DNA Ligase (NEB M0202). The resulting targeting gRNAs were transformed and maxi-prepped, then sequenced with T7 and T3 oligos. They were then injected into flies expressing Cas9 in the ovary under the control of vas regulatory sequences (BDRC 51323) by The BestGene Inc. at 250 ng/μl per plasmid.

### ***Kinase Assay***

Purified *Tribolium castaneum* PINK1 tagged with MBP (Boston Biochem AP-180) (Woodroof et al., 2011) was incubated with purified MCAD (Origene TP720903) at a 1:9 molar ratio in 60 μl of 1x kinase assay buffer (10x is 50 mM Tris-HCl pH 7.5, 0.1 mM EGTA, 10 mM MgCl<sub>2</sub>, 2 mM dithiothreitol, and 10 mM maltose) and 3 μl of 100 mM ATP at 30°C for 2 hrs. Reactions that were not to be later treated with calf intestinal alkaline phosphatase (CIP; NEB M0508) also included 15 μl Phosphatase Inhibitor Cocktail Set III (Millipore 524627). For CIP reactions, either 5 μl or 20 μl of CIP were used, and samples were placed at 37°C for 1 hr. All reactions were terminated by the addition of SDS sample buffer (300 mM Tris/HCl pH 6.8, 25% glycerol, 10% SDS, 0.1% bromophenol blue, and 14.4 mM 2-mercaptoethanol). Reactions were run on both 10% regular SDS-PAGE gels, and 10% SDS-PAGE gels containing 30 μM Phos-tag (Wako, 300-93523) following

manufacturer's instructions. Resulting Western blots were immunoblotted with anti-MCAD (Abcam ab110296) at 1:500 and anti-MBP (CST 2396) at 1:400, followed by HRP-conjugated goat anti-mouse IgG (Jackson ImmunoResearch 115035166) at 1:10,000 for chemiluminescent imaging. See below for imaging information.

### **Western Blots**

To observe the localization patterns of tagged constructs, 25 13-14-day-old male and female flies per sample were gently homogenized in 500  $\mu$ l mitochondrial isolation buffer (sucrose, mannitol, 1M TRIS-HCl pH 7.5, 0.2M EDTA/TRIS pH 7.4) at 4°C. Lysate was then centrifuged 600g for 10 min at 4°C to remove cell debris and nuclei, then 7,000g for 10min at 4°C to separate mitochondrial and cytosolic fractions. The mitochondrial pellet was then washed three times in mitochondrial isolation buffer and re-suspended in RIPA buffer for Western blotting. To validate the human MCAD antibody in flies, 10 0-5-day-old male flies per sample were homogenized; to observe transgenic expression in *PINK1* null flies, five 13-14-day-old male flies per sample were homogenized; and to observe transgenic expression levels in *MCAD<sup>mut</sup>* flies, three 2-3-day-old male and female flies per sample were homogenized

Flies were homogenized in RIPA buffer at a ratio of one fly to 10  $\mu$ l of buffer, and then centrifuged at 13,000 rpm at 4°C for 30 min to remove debris. Lysates were run on SDS-PAGE gels and immunoblotted with the primary antibodies anti-MCAD (Abcam ab110296) at 1:500, anti-V5 (Invitrogen MA5-15253) at 1:500, anti-mitofusin 2 (which recognizes OPA1 in *Drosophila*; Sigma M6319) at 1:500, and/or anti-tubulin (Invitrogen 62204) at 1:1000, as needed. Secondary antibodies used were Cy5-conjugated goat anti-mouse (Amersham PA45009V) at 1:5,000 for fluorescent imaging, and HRP-conjugated goat anti-mouse IgG (Jackson ImmunoResearch 115035166) and HRP-conjugated goat anti-rabbit IgG (Jackson ImmunoResearch 111035144) at 1:10,000 for chemiluminescent imaging.

For representative chemiluminescent images, immunoblots were imaged on an SRX-101A film processor (Konica Minolta). For quantification, fluorescent immunoblots were imaged on a Storm 860 Imager (GE Amersham). Quantification was performed using ImageJ 1.46r (NIH).

### **Phosphopeptide Quantification**

Mitochondrial pellets were re-suspended in Laemmli buffer (Laemmli, 1970), incubated 10 min at 95°C, cooled to room temperature and alkylated using acrylamide (1% final concentration) for 30 min. Proteins were separated using SDS-PAGE, the gel stained overnight using Coomassie Brilliant Blue, washed using MilliQ water 3 times for 5 min on a shaker, and destained for 4 h. Each gel lane was partitioned to 4 pieces, each piece cut to cubes of approximately 1 mm<sup>2</sup>, and transferred to microtubes. Gel pieces were de-stained, dehydrated and in-gel digestion was performed overnight at 37° C using trypsin in 0.1M NH<sub>4</sub>HCO<sub>3</sub> as described (Winter and Steen, 2011). Peptides were extracted from the gel by subsequent incubations with 50% acetonitrile (ACN) 0.1% trifluoroacetic (TFA) acid, 0.1M NH<sub>4</sub>HCO<sub>3</sub> and ACN (for details, see (Winter and Steen, 2011)), and the combined fractions were dried using a vacuum centrifuge. Dried samples were re-suspended in 50% ACN, 0.1% TFA and phospho-peptide enrichment was performed following the SIMAC approach

(Thingholm et al., 2007). Briefly, peptides were incubated with IMAC Fe-beads (PHOS-Select Iron Affinity Gel, Sigma Aldrich) for 30 min on a vibrating shaker, the beads were centrifuged down, and the supernatant was discarded. Beads were washed using 50% ACN and 0.1% TFA, centrifuged, and the supernatant was discarded. After incubation with 20% ACN and 1% TFA, beads were centrifuged again, the supernatant was transferred to a new tube (eluate fraction 1) and the beads eluted with 0.5% NH<sub>3</sub> (eluate fraction 2). After another round of centrifugation, eluate fraction 2 was separated from the beads and acidified using formic acid (FA). Both eluate fractions were dried using a vacuum centrifuge, re-suspended in 80% ACN 5% TFA, and incubated with TiO<sub>2</sub> beads (GL Sciences) for 30 min on a vibrating shaker, centrifuged, and the supernatant was discarded. After one wash with 80% ACN and 1% TFA, beads were eluted using 0.5% NH<sub>3</sub>, eluate fractions were acidified using FA, and dried using a vacuum centrifuge.

Dried samples were re-suspended in a 50 mM citrate solution (Winter et al., 2009), and loaded directly on the analytical column at a flow rate of 1 µl/min 100% solvent A (water with 0.1% FA) using an EASY-nLC 1000 ultra-high performance liquid chromatography system (Thermo Scientific). Analytical columns were manufactured in-house by packing spray tips generated from 360 µm outer diameter 100µm inner diameter fused silica glass capillaries using a P2000 laser puller (Sutter Instrument) with 5 µm C<sub>18</sub>-AQ material (Dr. Maisch GmbH). After loading and washing for 16 min at 1 µl/min 100% solvent A, peptides were eluted with a 30 min linear gradient from 100% solvent A, 0% solvent B (ACN with 0.1% FA) to 65% solvent A, 35% solvent B at 400 nl/min. Eluting peptides were ionized in the positive ion mode at 1.6 kV in the nanosource of an Orbitrap Velos mass spectrometer (Thermo Scientific). After one survey scan from m/z 400 to 1200 in the Orbitrap part of the instrument at a resolution of 30,000, the top 10 most abundant ions were selected for fragmentation in the ion trap part of the instrument in the multi-stage activation (MSA) mode. MSA was triggered by neutral losses of 98, 49, 32.7 and 24.5 relative to the precursor ion. Dynamic exclusion was set to 60 s with an exclusion list size of 500.

Thermo raw data were analyzed using Maxquant version 1.3.0.5 with the following parameters: oxidation at methionine, acetylation of protein N-termini and phosphorylation at serine, threonine and tyrosine as variable modification; propionamide at cysteine as fixed modification; tryptic cleavage with two missed cleavage sites; MSMS ion tolerance of 0.5 Da. Data were searched against a FASTA file containing *Drosophila melanogaster* proteins contained in the 2014\_01 release of Uniprot ([www.uniprot.org](http://www.uniprot.org)), as well as common contaminants as defined in the cRAP database ([www.thegpm.org/crap](http://www.thegpm.org/crap)). Identified peptides were exported at a false discovery rate (FDR) of 1% and further analyzed using MS Excel. MS raw data were manually analyzed using Xcalibur 2.2 (Thermo Scientific). For quantification of peptides, extracted ion chromatograms (XICs) of the monoisotopic peptide peak were generated, the area under the curve quantified and the ratio calculated. This protocol has also been summarized (**Figure S1**).

### ***Acylcarnitine Analysis***

Sample analysis was based on the clinical assay using tandem mass spectrometry to measure butylated acylcarnitine species as described previously (Matern, 2008). Five flies per sample were homogenized in 50 µl of 3:1 methanol (Sigma) and acetonitrile (Burdick Jackson), and centrifuged to remove debris. High, low, abnormal, and negative controls were included with each run using 20

$\mu\text{l}$  of sample. 300  $\mu\text{l}$  of isotope-labeled internal standards (Cambridge Isotope) in acetonitrile and 0.4% formic acid (Sigma) were added directly to each sample. Samples were vortexed and centrifuged for 5 min at 13,000 rpm. Supernatant was decanted into glass reaction vials and dried for at least 45 min under nitrogen. Acylcarnitines were re-suspended and derivatized in 100  $\mu\text{l}$  of 3N HCl in butanol (Regis Technologies Inc.) and incubated at 65°C for 15 min. Samples were dried again under nitrogen for at least 1 h. Finally, samples were re-suspended in 100  $\mu\text{l}$  of 80% acetonitrile and transferred to glass injection vials for analysis on a tandem mass spectrometer (ABSciex 4500 ESI-MS/MS). Control samples were re-suspended in 200  $\mu\text{l}$  of 80% acetonitrile. Injection volume was set at 10  $\mu\text{l}$ . The acylcarnitine profile was collected in positive mode using precursor scanning of  $m/z$  85. Data were acquired using Analyst 1.6.2 and quantified using ChemoView version 2.0.3.

### ***Quantitative Free Amino Acids***

Five flies per sample were homogenized in 50  $\mu\text{l}$  of extraction solution (3:1 methanol: acetonitrile with 1% formic acid) and centrifuged to remove debris. Then, 2.5  $\mu\text{l}$  of extract were combined with 2.5  $\mu\text{l}$  of deionized water and 140  $\mu\text{l}$  of amino acid-internal standard solution in a mass spec glass insert vial. Data were collected on a tandem mass spectrometer (Agilent 6460 Tandem Mass Spectrometer) following previously described methods (Le et al., 2014). Peaks were integrated and compared to calibration curves using MassHunter Quantitative Analysis software.

### ***Free Carnitine***

Five flies per sample were homogenized in 50  $\mu\text{l}$  of extraction solution (3:1 methanol: acetonitrile with 1% formic acid) and centrifuged to remove debris. Then, 5  $\mu\text{l}$  of fly extract were combined with 45  $\mu\text{l}$  of HPLC pure water (Sigma) and 50  $\mu\text{l}$  of D<sub>3</sub>-carnitine (Cambridge Isotopes) internal standard in a Nanosep 3k MWCO spin cup (Pall). Samples were centrifuged at 13,000 rpm for 15 min. 20  $\mu\text{l}$  of filtrate were combined with 400  $\mu\text{l}$  of Mobile Phase A (ammonium formate, pH 8.0). 10  $\mu\text{l}$  of 1M potassium hydroxide (Fisher Scientific) was added to the remaining filtrate, vortexed, and then incubated at 65°C for 15 min. Base was neutralized with 10  $\mu\text{l}$  of 1M hydrochloric acid (JT Baker). Samples were vortexed and 20  $\mu\text{l}$  of the hydrolyzed filtrate was combined with 400  $\mu\text{l}$  of Mobile Phase A in a 96 deep well sample block. Samples were analyzed by tandem mass spectrometry (ABSciex 4500). Carnitine was detected using MRM 162.2>85.1 and 162.2>103.2 with 85 used as the qualifier ion and carnitine quantified from 103.2  $m/z$ . The internal standard was detected at 165.2>85.1 and 165.2>105.2. Carnitine was separated on a Gemini 3x100 mm column (Phenomenex) using a 3-minute elution program. Two microliters of sample were injected into the mass spectrometer and washed with 10% mobile phase B (acetonitrile with 0.4% formic acid) for 0.8 min followed by a gradient of 10-30% mobile phase B over 1 min. The column was washed with 30%-99% mobile phase B over 0.5 min following by re-equilibration at 10% mobile phase B. Carnitine elutes at 1.24 minutes.

Concentration of carnitine was calculated from a six-point calibration curve made in charcoal-stripped serum and handled the same as specimens: 400, 200, 100, 50, 10, and 1  $\mu\text{M}$ . Concentrations were calculated using MultiQuant 3.0.2.

## Supplemental References

- Bischof, J., Maeda, R.K., Hediger, M., Karch, F., and Basler, K. (2007). An optimized transgenesis system for *Drosophila* using germ-line-specific C31 integrases. *Proc. Natl. Acad. Sci.* *104*, 3312–3317.
- Gratz, S.J., Cummings, A.M., Nguyen, J.N., Hamm, D.C., Donohue, L.K., Harrison, M.M., Wildonger, J., and O'Connor-Giles, K.M. (2013). Genome engineering of *Drosophila* with the CRISPR RNA-guided Cas9 nuclease. *Genetics* *194*, 1029–1035.
- Gratz, S.J., Ukken, F.P., Rubinstein, C.D., Thiede, G., Donohue, L.K., Cummings, A.M., and O'Connor-Giles, K.M. (2014). Highly Specific and Efficient CRISPR/Cas9-Catalyzed Homology-Directed Repair in *Drosophila*. *Genetics* *196*, 961–971.
- Gratz, S.J., Harrison, M.M., Wildonger, J., and O'Connor-Giles, K.M. (2015). Precise Genome Editing of *Drosophila* with CRISPR RNA-Guided Cas9. In *CRISPR: Methods and Protocols*, pp. 335–348.
- Laemmli, U.K. (1970). Cleavage of structural proteins during assembly of the head of bacteriophage-T4. *Nature* *227*, 680–685.
- Le, A., Ng, A., Kwan, T., Cusmano-Ozog, K., and Cowan, T.M. (2014). A rapid, sensitive method for quantitative analysis of underivatized amino acids by liquid chromatography-tandem mass spectrometry (LC-MS/MS). *J. Chromatogr. B Anal. Technol. Biomed. Life Sci.* *944*, 166–174.
- Matern, D. (2008). Acylcarnitines, Including In Vitro Loading Tests. In *Laboratory Guide to the Methods in Biochemical Genetics*, pp. 171–206.
- Thingholm, T.E., Jensen, O.N., Robinson, P.J., and Larsen, M.R. (2007). SIMAC (Sequential Elution from IMAC), a Phosphoproteomics Strategy for the Rapid Separation of Monophosphorylated from Multiply Phosphorylated Peptides. *Mol. Cell. Proteomics* *7*, 661–671.
- Winter, D., and Steen, H. (2011). Optimization of cell lysis and protein digestion protocols for the analysis of HeLa S3 cells by LC-MS/MS. *Proteomics* *11*, 4726–4730.
- Winter, D., Seidler, J., Ziv, Y., Shiloh, Y., and Lehmann, W.D. (2009). Citrate boosts the performance of phosphopeptide analysis by UPLC-ESI-MS/MS. *J. Proteome Res.* *8*, 418–424.
- Woodroof, H.I., Pogson, J.H., Begley, M., Cantley, C., Deak, M., Campbell, D.G., Van, D.M.F., Whitworth, A.J., Alessi, D.R., and Muqit, M.K. (2011). Discovery of catalytically active orthologues of the Parkinson's disease kinase PINK1: analysis of substrate specificity and impact of mutations. *Open Biol.* *1*, 110012.

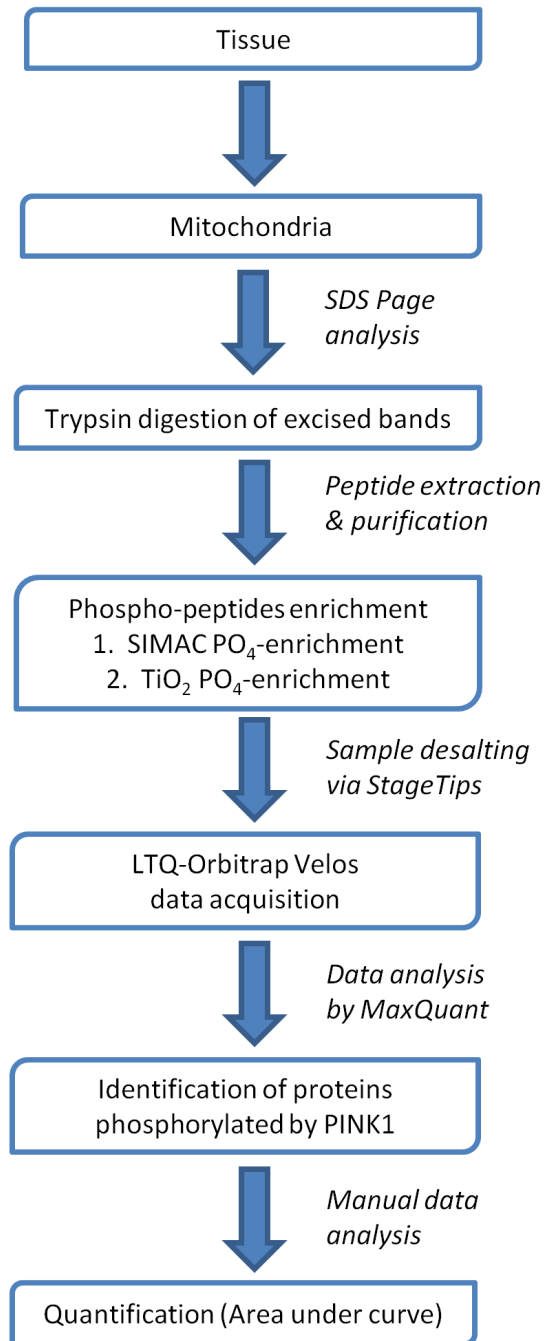

**Figure S1. Schematic overview of PINK1 phosphopeptide analysis.**



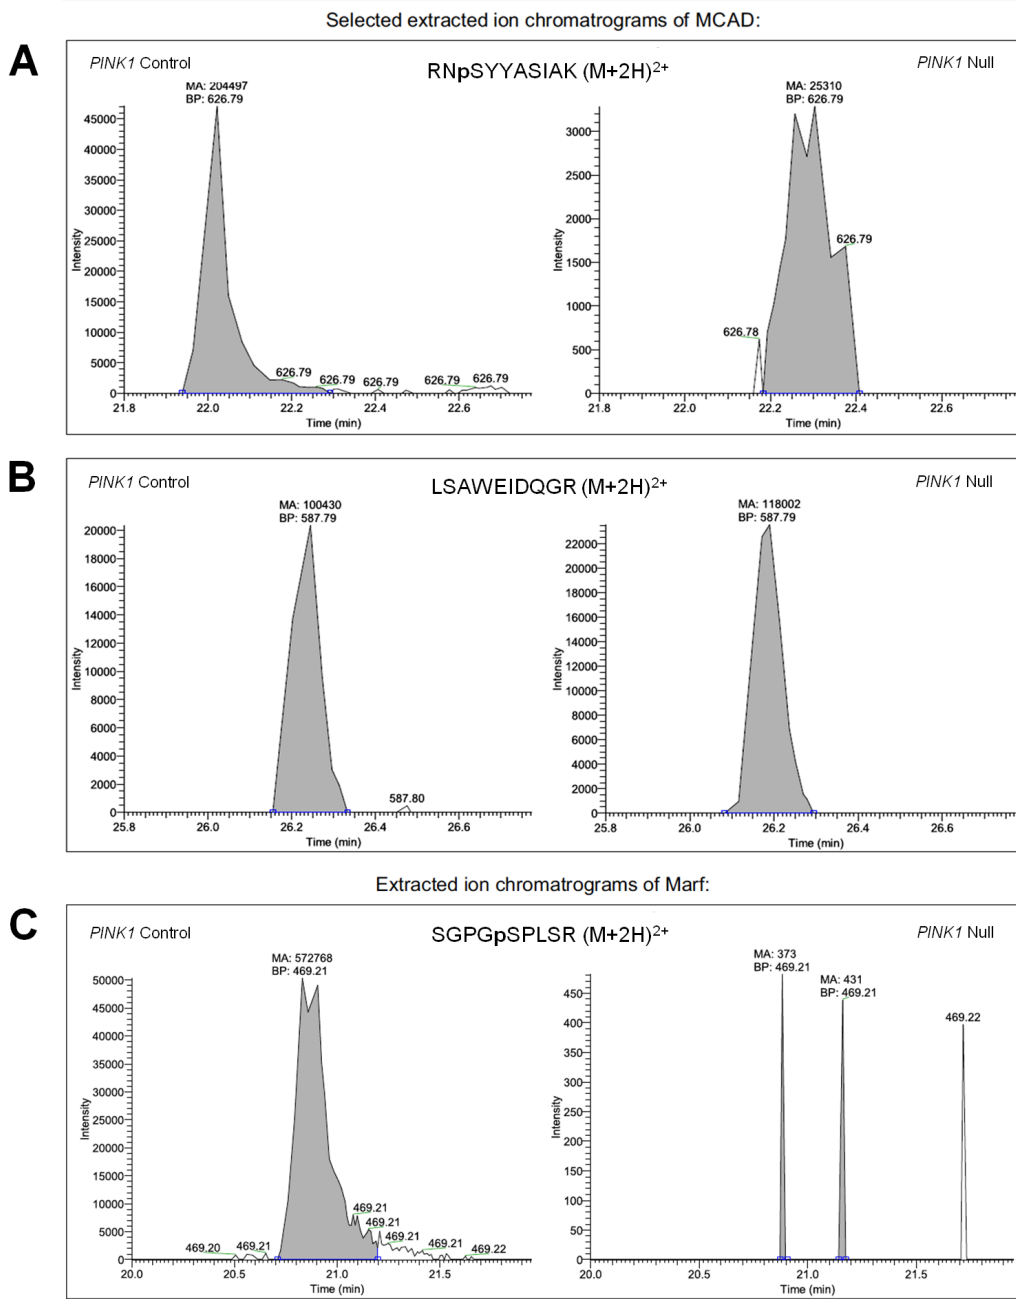

**Relative quantification of peptides**

| Protein | Peptide     | <i>PINK1</i> Control | <i>PINK1</i> null |
|---------|-------------|----------------------|-------------------|
| MCAD    | RNpSYIASIAK | 204,497              | 25,310            |
| MCAD    | LSAWEIDQGR  | 100,430              | 118,002           |
| Marf    | SGPGpSPLSR  | 572,768              | 804               |

Figure S2. Phosphopeptide abundance of MCAD S347 in *Drosophila*.

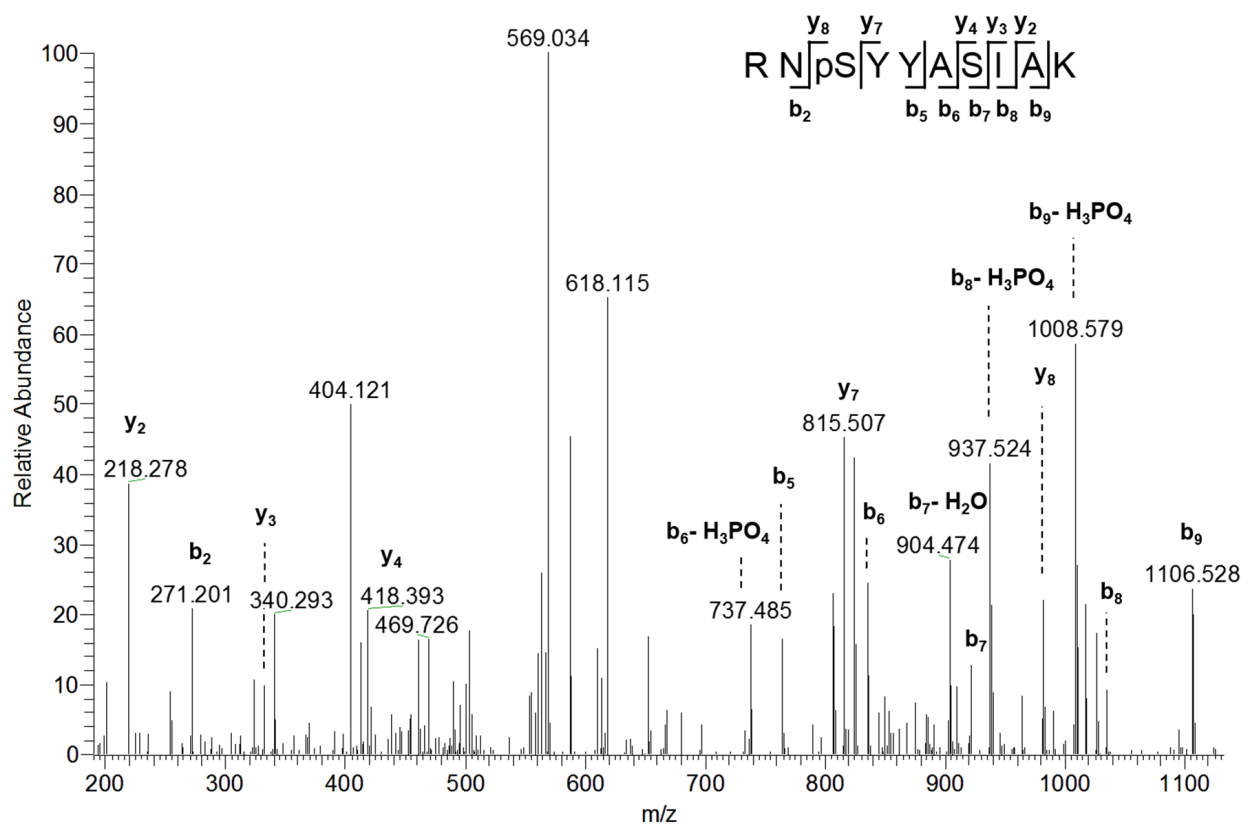

Figure S3. Fragment ion spectrum of the doubly charged precursor ion at  $m/z$  626.79 identifying the phosphopeptide RNpSYIASIAK.

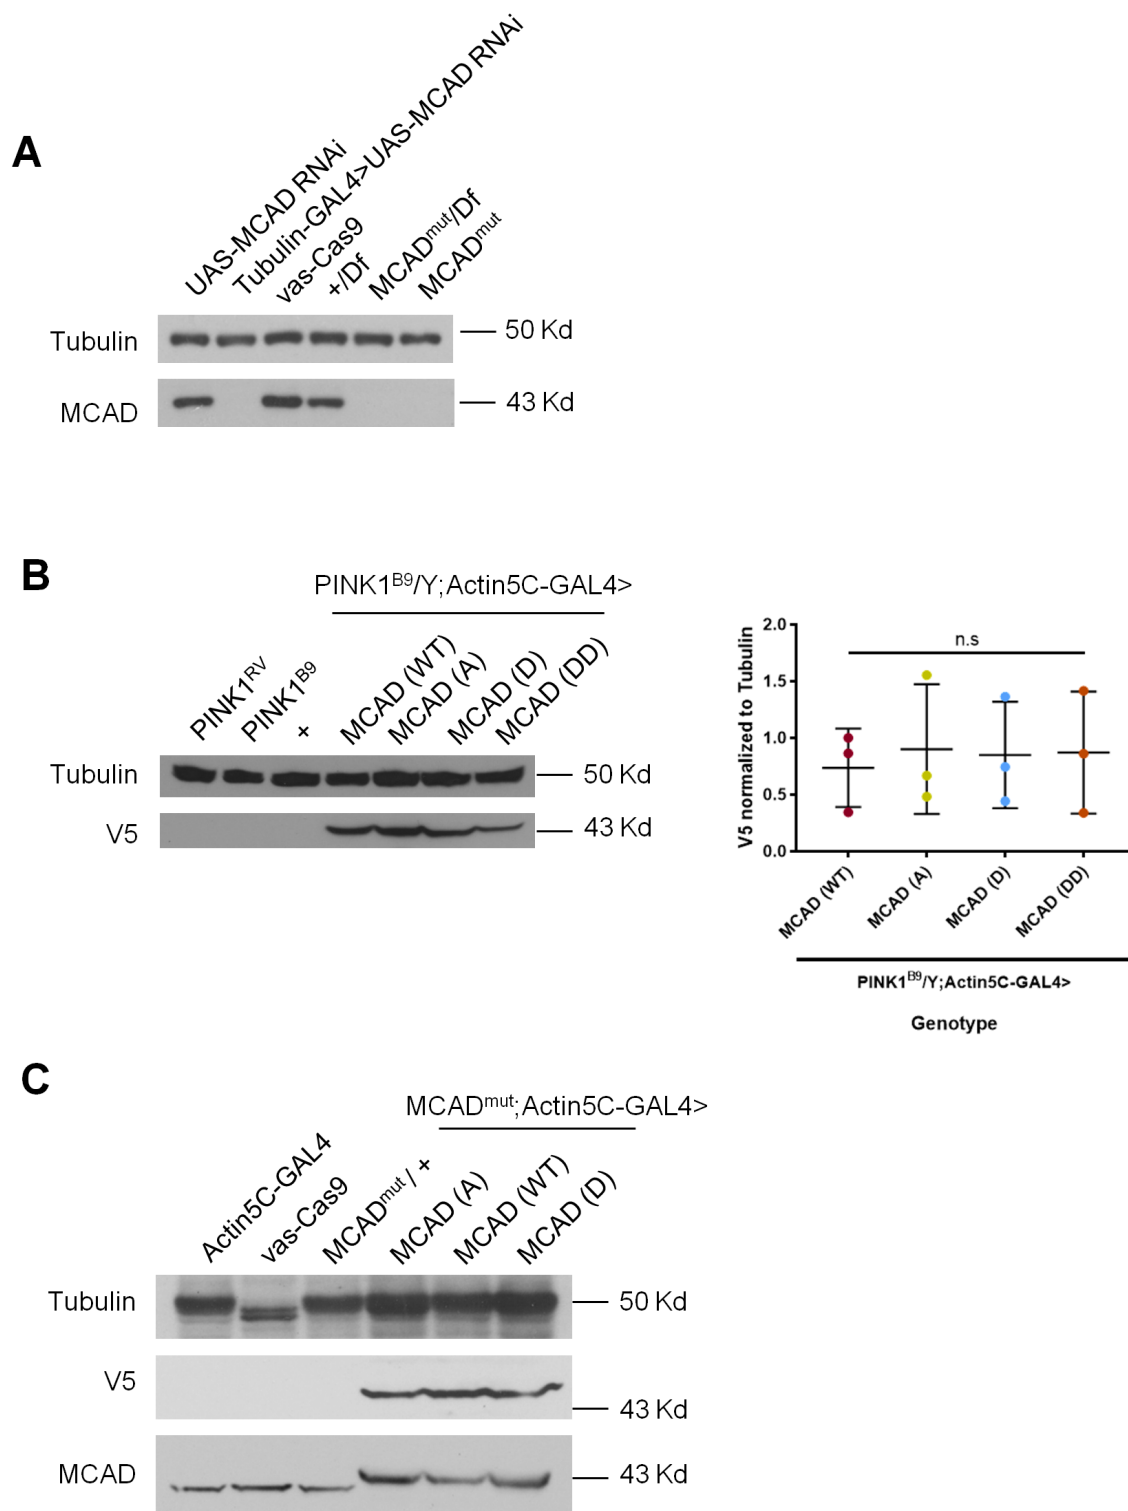

Figure S4. Expression of MCAD transgenes.

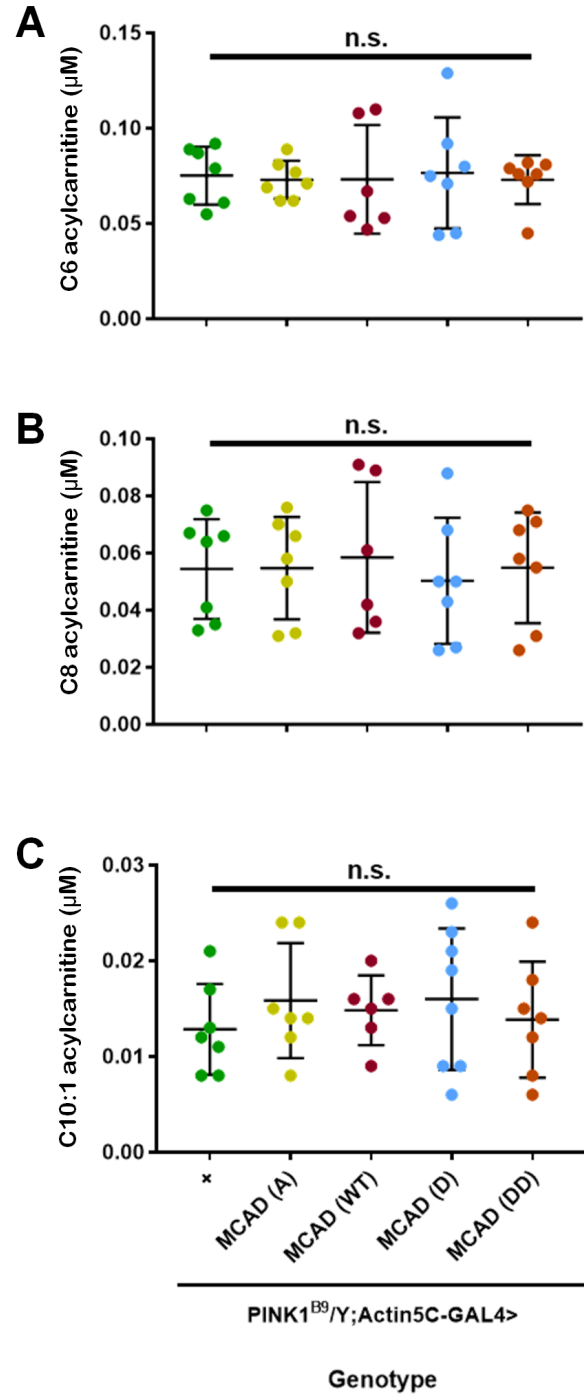

Figure S5. Acylcarnitine analysis in *PINK1* null flies carrying MCAD transgenes.

---

**Table S1. Phos (STY) site probabilities**

---

| <b>Proteins</b> | <b>Genes</b>        | <b>Amino acid position</b> | <b>Location score</b> | <b>Modified sequence</b> | <b>Phos (STY) Probabilities</b>          |
|-----------------|---------------------|----------------------------|-----------------------|--------------------------|------------------------------------------|
| Q9VSA3          | CG12262<br>(MCAD)   | 347                        | 110.08                | RN <b>p</b> SYIASIAK     | RNS( <b>0.806</b> )Y(0.161)Y(0.032)ASIAK |
| Q7YU24          | Marf<br>(mitofusin) | 38                         | 67.334                | SGPG <b>p</b> SPLSR      | SGPGS( <b>0.612</b> )PLS(0.388)R         |

---

**Table S2. Acylcarnitine profile of *PINK1* null flies**

| Acylcarnitine                 | Mean                |                     | Standard Deviation  |                     | P-value | Significant change |
|-------------------------------|---------------------|---------------------|---------------------|---------------------|---------|--------------------|
|                               | PINK1 <sup>RV</sup> | PINK1 <sup>B9</sup> | PINK1 <sup>RV</sup> | PINK1 <sup>B9</sup> |         |                    |
| Free carnitine, c0            | 49.1                | 17.7                | 3.63                | 2.14                | <0.0001 | down               |
| Acetyl-, c2                   | 35.3                | 21.4                | 11.7                | 5.20                | 0.0161  | down               |
| Propienyl-, c3:1              | 0.0223              | 0.0164              | 0.0125              | 0.00416             | 0.262   |                    |
| Propionyl-, c3                | 5.41                | 2.62                | 2.16                | 0.574               | 0.0071  | down               |
| Isobutryl-, c4                | 0.321               | 0.344               | 0.114               | 0.0593              | 0.654   |                    |
| Tiglyl-, c5:1                 | 0.0113              | 0.00814             | 0.00742             | 0.00280             | 0.312   |                    |
| Isovaleryl-, c5               | 0.0483              | 0.0513              | 0.0299              | 0.0202              | 0.836   |                    |
| Hydroxybutyryl-, c4-OH        | 0.0485              | 0.0454              | 0.00959             | 0.0131              | 0.644   |                    |
| Hexanoyl-, c6                 | 0.0467              | 0.0701              | 0.0120              | 0.0144              | 0.0093  | up                 |
| 3-OH-Isovaleryl-, c5-OH       | 0.0170              | 0.0213              | 0.0141              | 0.00640             | 0.483   |                    |
| Heptanoyl-, c7                | 0.0163              | 0.0235              | 0.00288             | 0.00105             | 0.0002  | up                 |
| 3-OH-Hexanoyl-, c6-OH         | 0.0278              | 0.0220              | 0.0122              | 0.00535             | 0.274   |                    |
| Octenoyl-, c8:1               | 0.0144              | 0.0231              | 0.00699             | 0.00747             | 0.0674  |                    |
| Octanoyl-, c8                 | 0.0287              | 0.0456              | 0.00367             | 0.0105              | 0.0034  | up                 |
| Malonyl-, c3-DC               | 0.270               | 0.244               | 0.176               | 0.204               | 0.810   |                    |
| Decadienoyl-, c10:2           | 0.0227              | 0.0243              | 0.0306              | 0.0218              | 0.914   |                    |
| Decenoyl-, c10:1              | 0.0115              | 0.0120              | 0.00485             | 0.00545             | 0.866   |                    |
| Decanoyl-, c10                | 0.0342              | 0.0404              | 0.0103              | 0.0142              | 0.389   |                    |
| Methylmalonyl-, c4-DC         | 0.0438              | 0.0297              | 0.0397              | 0.0184              | 0.416   |                    |
| 3-OH-Decenoyl-, c10:1-OH      | 0.0222              | 0.0183              | 0.0125              | 0.00905             | 0.531   |                    |
| Glutaryl-, c5-DC              | 0.0482              | 0.0381              | 0.0142              | 0.00652             | 0.121   |                    |
| Dodecenoyl-, c12:1            | 0.0272              | 0.0490              | 0.00256             | 0.0130              | 0.0020  | up                 |
| Dodecanoyl-, c12              | 0.0458              | 0.0800              | 0.00649             | 0.0283              | 0.0151  | up                 |
| 3-OH-Dodecenoyl-, c12:1-OH    | 0.0272              | 0.0333              | 0.0110              | 0.00905             | 0.294   |                    |
| 3-OH-Dodecanoyl-, c12-OH      | 0.0235              | 0.0384              | 0.00942             | 0.0116              | 0.0288  | up                 |
| Tetradecadienoyl-, c14:2      | 0.0173              | 0.0231              | 0.00437             | 0.00534             | 0.0573  |                    |
| Tetradecenoyl-, c14:1         | 0.0517              | 0.105               | 0.0362              | 0.0335              | 0.0193  | up                 |
| Tetradecanoyl-, c14           | 0.0900              | 0.152               | 0.0374              | 0.0448              | 0.0217  | up                 |
| 3-OH-Tetradecenoyl-, c14:1-OH | 0.0937              | 0.0993              | 0.0190              | 0.0313              | 0.710   |                    |
| 3-OH-Tetradecanoyl-, c14-OH   | 0.0400              | 0.0571              | 0.0114              | 0.0128              | 0.0281  | up                 |
| Palmitoleyl-, c16:1           | 0.0845              | 0.198               | 0.0226              | 0.0726              | 0.0037  | up                 |
| Palmitoyl-, c16               | 0.0762              | 0.231               | 0.0149              | 0.0746              | 0.0004  | up                 |
| 3-OH-Palmitoleyl-, c16:1-OH   | 0.119               | 0.144               | 0.0242              | 0.0411              | 0.215   |                    |
| 3-OH-Palmitoyl-, c16-OH       | 0.0507              | 0.0589              | 0.0144              | 0.0170              | 0.373   |                    |
| Linoleyl-, c18:2              | 0.0250              | 0.0520              | 0.00478             | 0.0128              | 0.0005  | up                 |
| Oleyl-, c18:1                 | 0.146               | 0.296               | 0.0404              | 0.102               | 0.0061  | up                 |
| Stearoyl-, c18                | 0.122               | 0.152               | 0.0166              | 0.0197              | 0.0142  | up                 |
| 3-OH-Linoleyl-, c18:2-OH      | 0.0263              | 0.0296              | 0.00812             | 0.00688             | 0.452   |                    |
| 3-OH-Oleyl-, c18:1-OH         | 0.0285              | 0.0524              | 0.00912             | 0.0159              | 0.0078  | up                 |
| 3-OH-Stearoyl-, c18-OH        | 0.0163              | 0.0193              | 0.00596             | 0.00591             | 0.390   |                    |

**Table S3. Amino acid profile of *PINK1* null flies**

| Amino Acid                       | Mean                |                     | Standard Deviation  |                     | P-value | Significant change |
|----------------------------------|---------------------|---------------------|---------------------|---------------------|---------|--------------------|
|                                  | PINK1 <sup>RV</sup> | PINK1 <sup>B9</sup> | PINK1 <sup>RV</sup> | PINK1 <sup>B9</sup> |         |                    |
| <b>Essential Amino Acids</b>     |                     |                     |                     |                     |         |                    |
| Histidine                        | 396                 | 232                 | 74.6                | 55.3                | 0.0196  | down               |
| Isoleucine                       | 30.5                | 26.1                | 8.66                | 4.03                | 0.401   |                    |
| Leucine                          | 38.0                | 37.8                | 11.2                | 6.56                | 0.983   |                    |
| Lysine                           | 67.8                | 247                 | 18.7                | 27.5                | 0.0002  | up                 |
| Methionine                       | 15.0                | 18.5                | 4.16                | 1.67                | 0.176   |                    |
| Phenylalanine                    | 12.1                | 16.3                | 3.00                | 2.09                | 0.0781  |                    |
| Threonine                        | 84.7                | 68.8                | 31.6                | 13.4                | 0.397   |                    |
| Tryptophan                       | 5.88                | 6.25                | 1.47                | 0.813               | 0.691   |                    |
| Valine                           | 61.9                | 68.2                | 18.4                | 12.8                | 0.613   |                    |
| <b>Non-Essential Amino Acids</b> |                     |                     |                     |                     |         |                    |
| Alanine                          | 633                 | 529                 | 231                 | 76.6                | 0.426   |                    |
| Asparagine                       | 19.3                | 13.6                | 5.60                | 1.61                | 0.107   |                    |
| Aspartic Acid                    | 127                 | 116                 | 38.2                | 18.5                | 0.617   |                    |
| Glutamic Acid                    | 533                 | 319                 | 137                 | 26.8                | 0.0254  | down               |
| <b>Conditional Amino Acids</b>   |                     |                     |                     |                     |         |                    |
| Arginine                         | 461                 | 280                 | 102                 | 50.5                | 0.0258  | down               |
| Cystine                          | 0.323               | 0.469               | 0.0191              | 0.0274              | 0.0006  | up                 |
| Glutamine                        | 668                 | 381                 | 216                 | 56.8                | 0.0471  | down               |
| Glycine                          | 177                 | 213                 | 38.9                | 26.2                | 0.197   |                    |
| Ornithine                        | 13.5                | 14.0                | 4.82                | 0.867               | 0.838   |                    |
| Proline                          | 1271                | 746                 | 354                 | 86.0                | 0.0320  | down               |
| Serine                           | 135                 | 156                 | 50.9                | 24.1                | 0.493   |                    |
| Tyrosine                         | 33.3                | 39.2                | 9.15                | 5.12                | 0.322   |                    |
| <b>Other Amino Acids</b>         |                     |                     |                     |                     |         |                    |
| 1-MethylHistidine                | 3.79                | 0.646               | 0.735               | 0.239               | 0.0004  | down               |
| 2-AminoAdipic Acid               | 0.357               | 0.770               | 0.0904              | 0.140               | 0.0069  | up                 |
| 3-Aminoisobutyric acid           | 6.23                | 6.74                | 0.916               | 0.429               | 0.363   |                    |
| 3-MethylHistidine                | 22.3                | 2.55                | 7.47                | 2.19                | 0.0036  | down               |
| 4-Aminobutyric Acid              | 55.2                | 35.2                | 15.0                | 3.74                | 0.0454  | down               |
| Allo-Isoleucine                  | 0.408               | 0.422               | 0.0284              | 0.0562              | 0.718   |                    |
| Argininosuccinic acid            | 0.117               | 1.55                | 0.106               | 0.292               | 0.0005  | up                 |
| β-Alanine                        | 1299                | 237                 | 268                 | 52.3                | 0.0005  | down               |
| Citrulline                       | 0.968               | 0.547               | 0.972               | 0.125               | 0.417   |                    |
| Creatine                         | 0.00359             | 0.00502             | 0.00161             | 0.00419             | 0.606   |                    |
| Creatinine                       | 0.251               | 0.232               | 0.0337              | 0.0359              | 0.492   |                    |
| Cystathionine                    | 0.816               | 4.70                | 0.269               | 0.670               | 0.0002  | up                 |
| Ethanolamine                     | 10.9                | 4.62                | 7.25                | 1.02                | 0.135   |                    |
| Guanidineacetic Acid             | 0.153               | 0.133               | 0.0444              | 0.0235              | 0.465   |                    |
| Homocystine                      | 0.167               | 0.179               | 0.0228              | 0.0137              | 0.400   |                    |
| Hydroxy Lysine                   | 0.171               | 0.136               | 0.0881              | 0.0533              | 0.541   |                    |
| Hydroxy Proline                  | 0.331               | 0.0778              | 0.154               | 0.0181              | 0.0198  | down               |
| Sarcosine                        | 5.18                | 2.58                | 1.92                | 1.38                | 0.0891  |                    |
| Taurine                          | 514                 | 475                 | 152                 | 42.4                | 0.631   |                    |
